# Supplementary material for: Iron-modulated Ni3S2derived from a Ni-MOF-based Prussian blue analogue for a highly efficient oxygen evolution reaction
Source: Royal Society of Chemistry journal article supplement (doi:10.1039/d2dt02729a), 2022-01-01
Supplement: d2dt02729a1.pdf [file d2dt02729a1.pdf]

## Supporting Information

### **Iron-modulated Ni<sub>3</sub>S<sub>2</sub> derived from a Ni-MOF-based Prussian blue analogue for highly efficient oxygen evolution reaction**

Yaoxia Yang<sup>\*,§</sup>, Fengyao Guo<sup>§</sup>, Lan Zhang, Xingwei Guo, Dangxia Wang,

Ruiqing Niu<sup>a</sup>, Haidong Yang, Jian Li, Guofu Ma and Ziqiang Lei

Key Laboratory of Eco-functional Polymer Materials of the Ministry of Education,

Key Laboratory of Eco-environmental Polymer Materials of Gansu Province,

College of Chemistry and Chemical Engineering, Northwest Normal University,

Lanzhou 730070, China.

---

\*Corresponding author.

*E-mail address:* yaoxiayang@nwnu.edu.cn; yangyaoxia2007@126.com (Y-X, Yang).

## Experimental Section

### Calculation

The specific calculation process for mass activity and turnover frequency (TOF) was as follows:

The values of mass activity ( $A\ g^{-1}$ ) were calculated from the catalysts loading  $m$  ( $mg\ cm^{-2}$ ) and the measured current density  $j$  ( $mA\ cm^{-2}$ ) at 0.33 V.

$$Mass\ activity = \frac{j}{m}$$

### Turnover frequency (TOF) calculation

TOF of catalyst was calculated using a method widely used in the literature, e.g. Nano Energy 2018, 51, 26-36. First, the active site ( $N$ ) of the catalytic electrode was calculated by the following formula:

$$N(mol) = \frac{Q}{2F} = \frac{it}{2F} = \frac{iV/u}{2F}$$

Where,  $Q$  represents the voltammetry charge obtained by integrating the cyclic voltammetry curve, CV curve is at a certain sweep velocity ( $50\ mV/s$ ) between  $-0.2 \sim 0.6\ V$  (vs. RHE) in phosphate buffer solution (PB,  $pH = 7.0$ ), the PB is prepared by mixing up  $38\ mL$  of  $0.2\ M\ NaH_2PO_4$  solution and  $62\ mL$  of  $0.2\ M\ Na_2HPO_4$ ; where  $Q$  is the cyclic voltammetric capacity obtained by integrating CV curves,  $F$  is the Faradic constant ( $96485\ C\ mol^{-1}$ ),  $i$  is the current density ( $A\ m^{-2}$ ),  $V$  is the voltage (V) and  $u$  is the scanning rate ( $V\ s^{-1}$ ).

Secondly, Faraday's constant (TOF) is calculated by the following formula:

$$TOF(s^{-1}) = \frac{|j|A}{nFN}$$

Where,  $j$  represents the current density at a given overpotential, where the

overpotential is 1.50 V (vs RHE); A represents the geometric area of the electrode; n represents the number of electrons consumed by hydroelectricity to decompose into a O<sub>2</sub>, n = 4 in OER process; F stands for Faraday constant (96485 C mol<sup>-1</sup>); N is the number of active sites.

### **Gas Chromatography Testing**

The Faradaic efficiency (FE) was calculated by using following equation

$$FE = \frac{N_{ex}}{N_{th}}$$

where N<sub>ex</sub> is the produced moles of oxygen and N<sub>th</sub> is the theoretical moles of oxygen.

Gas chronopotentiometry (GC-9560) testing was conducted with a constant current density of 100 mA cm<sup>-2</sup> in 1 M KOH seawater electrolyte. The theoretical amount of generated O<sub>2</sub> gases was calculated using the equation:

$$N_{th} = \frac{It}{4F}$$

Where N<sub>th</sub> is the theoretical amount (mol) of gaseous products, I is the current (A), t is the time (s) and F is the Faraday constant.

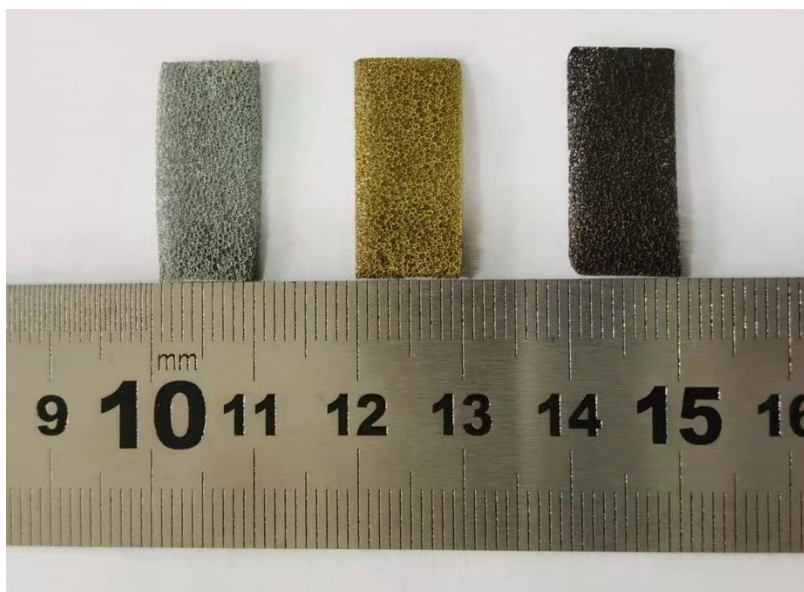

**Fig. S1.** Optical photographs of the Ni-MOF/NF, Ni-MOF@PBA/NF and the Fe-Ni<sub>3</sub>S<sub>2</sub>/NF with the size of 1.0 × 2 cm<sup>2</sup>.

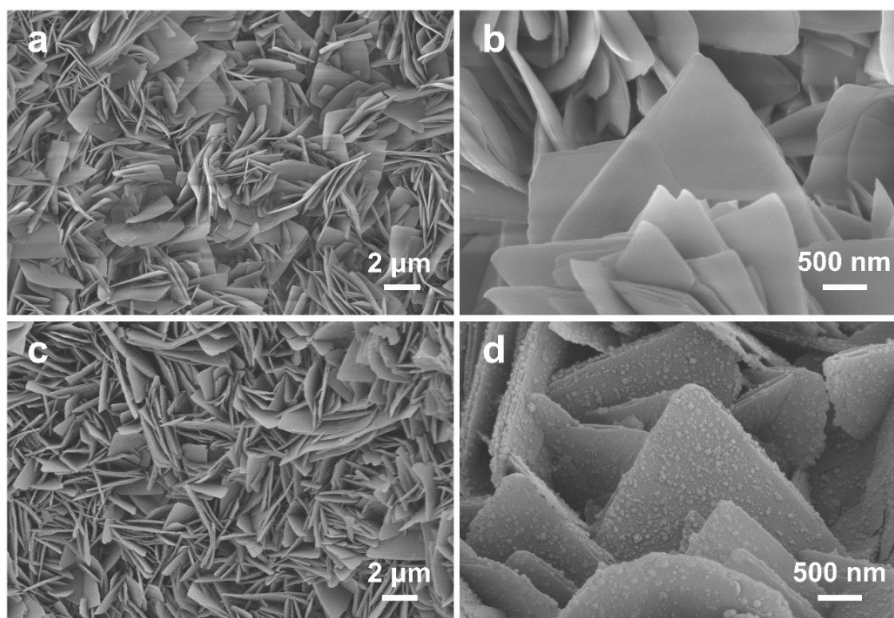

**Fig. S2.** SEM images of (a, b) Ni-MOF/NF, (c, d) Ni-MOF@PBA/NF.

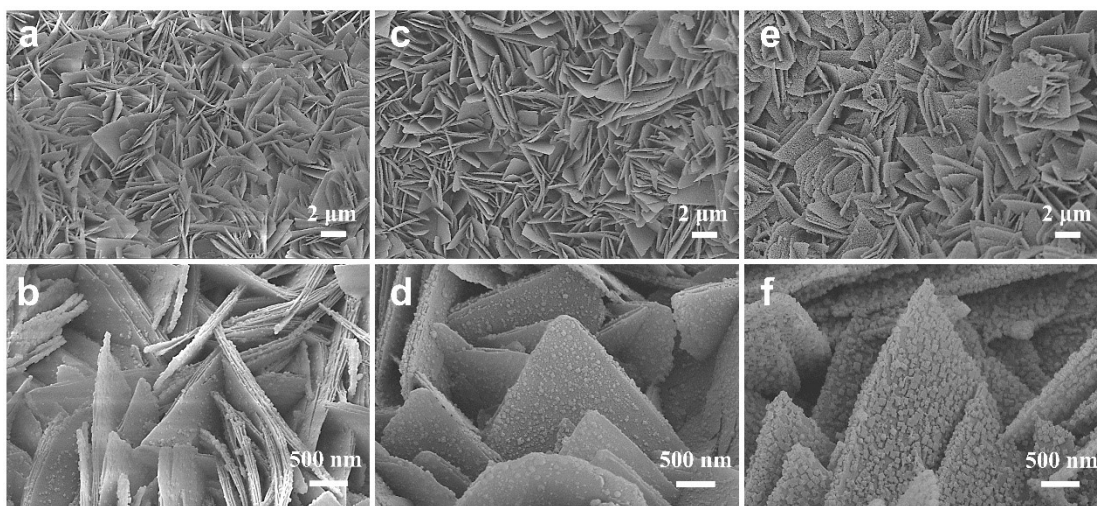

**Fig. S3.** SEM images of Ni-MOF@PBA/NF synthesized at room temperature for (a, b) 3 h, (c, d) 6 h, (e, f) 12 h.

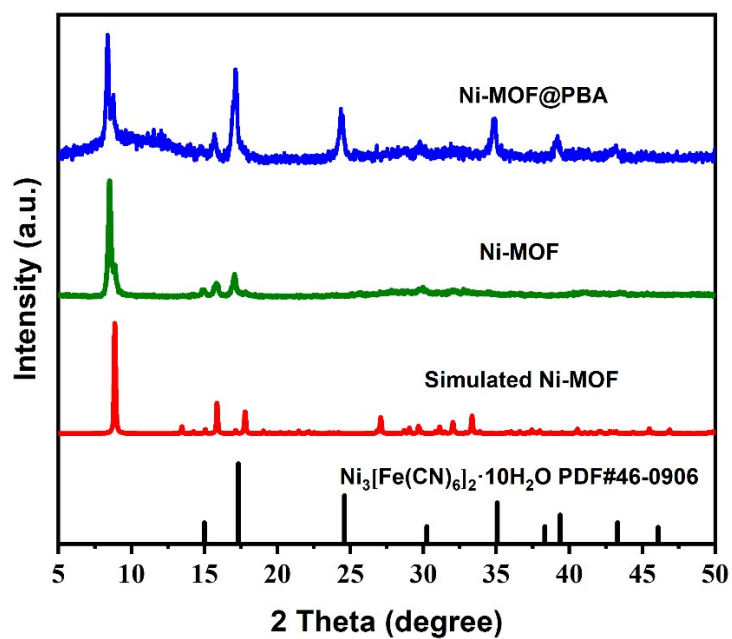

**Fig. S4.** XRD patterns of Ni-MOF and Ni-MOF@PBA.

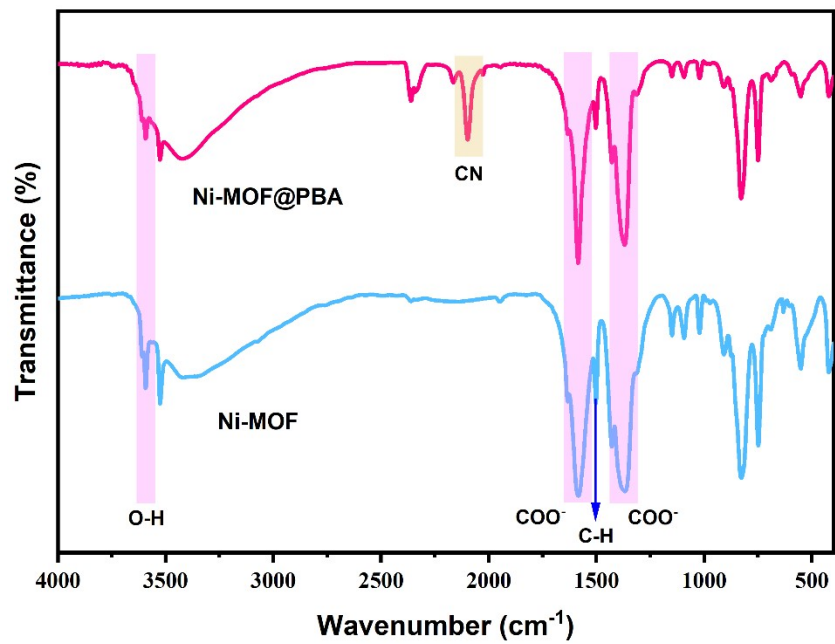

**Fig. S5.** FT-IR spectra of the as-obtained Ni-MOF and Ni-MOF@PBA.

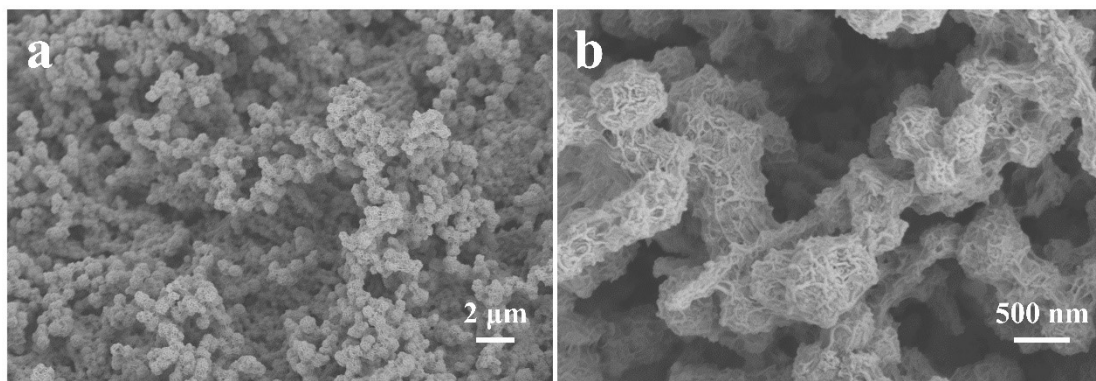

**Fig. S6.** SEM images of  $\text{Ni}_3\text{S}_2/\text{NF}$ .

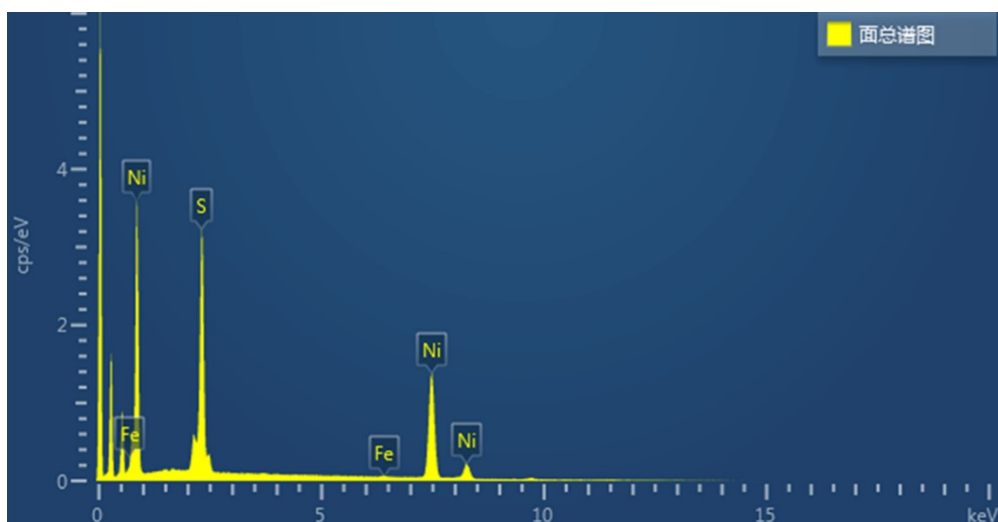

**Fig. S7.** EDS pattern of the soaked  $\text{Fe-Ni}_3\text{S}_2/\text{NF}$ .

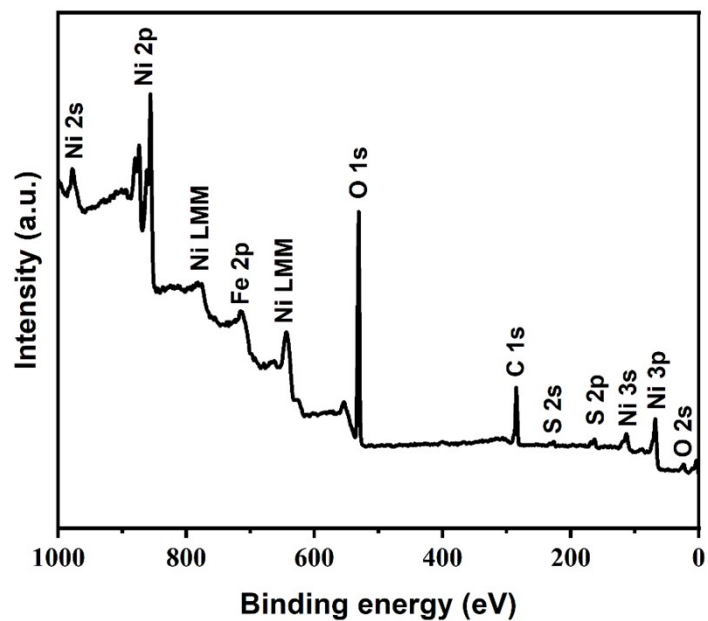

**Fig. S8.** XPS spectra of Fe-Ni<sub>3</sub>S<sub>2</sub>/NF survey scan.

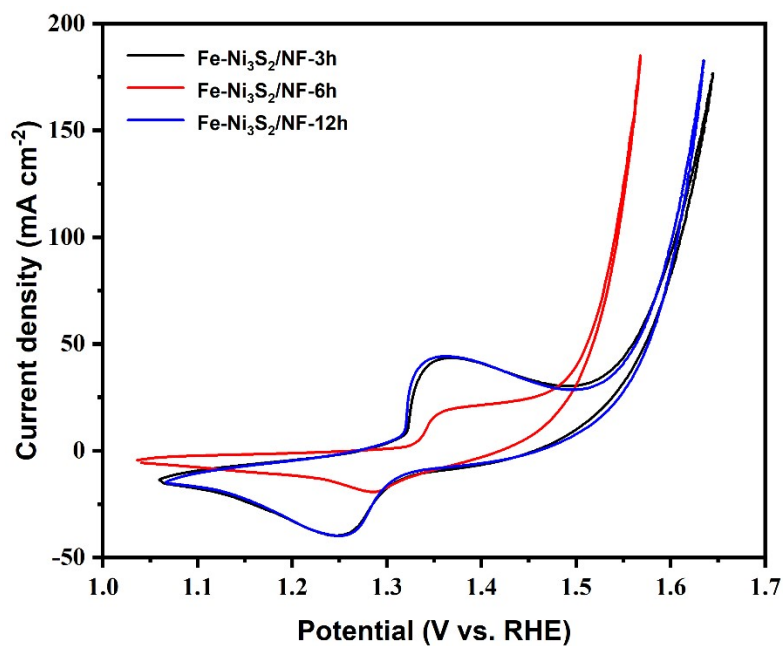

**Fig. S9.** Full CVs of Fe-Ni<sub>3</sub>S<sub>2</sub>/NF electrocatalysts at different in situ cation exchange reaction times for the OER in 1 M KOH at 5 mV s<sup>-1</sup>.



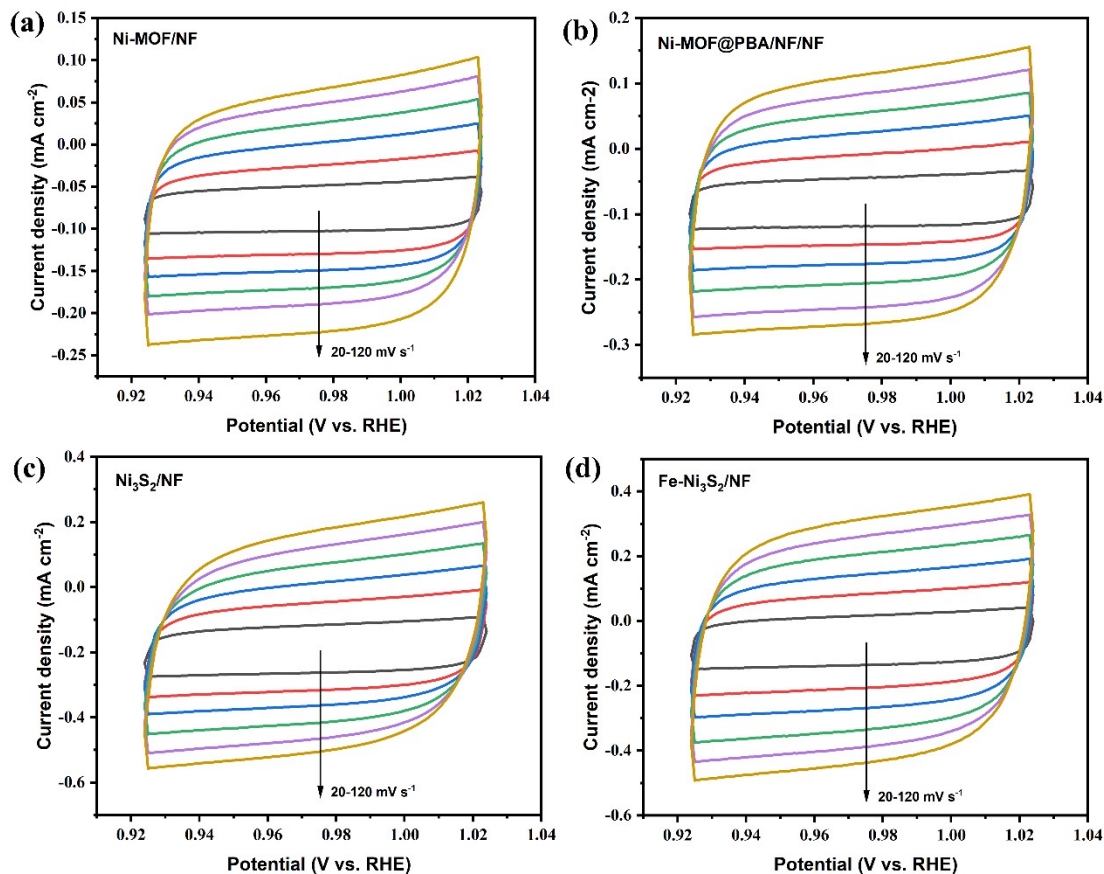

**Fig. S10.** CV curves of the NF, Ni-MOF@PBA/NF, Ni<sub>3</sub>S<sub>2</sub>/NF and the Fe-Ni<sub>3</sub>S<sub>2</sub>/NF at different scan rate of 20, 40, 60, 80, 100 and 120 mV·s<sup>-1</sup>.

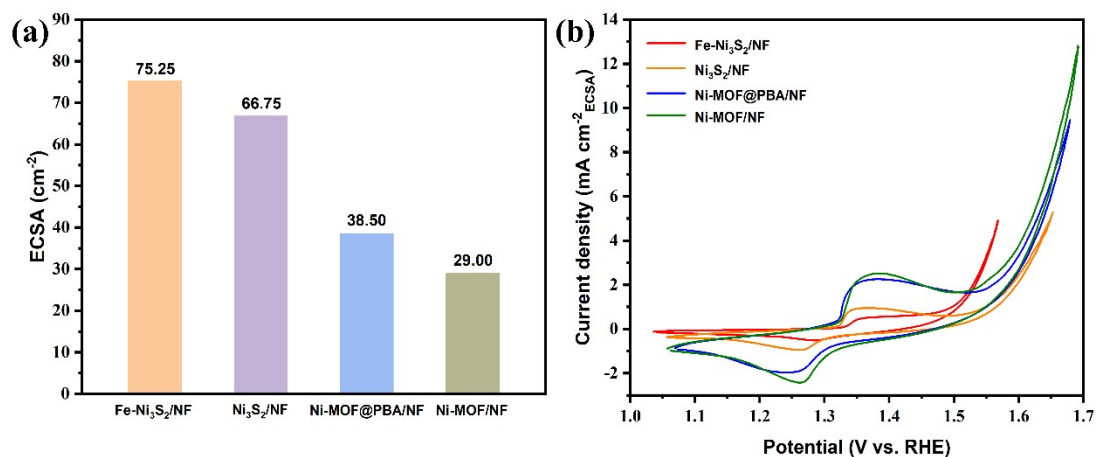

**Fig. S11.** (a) ECSA, and (b) ECSA-normalized OER activity of Fe-Ni<sub>3</sub>S<sub>2</sub>/NF, Ni<sub>3</sub>S<sub>2</sub>/NF, Ni-MOF@PBA/NF, Ni-MOF/NF.

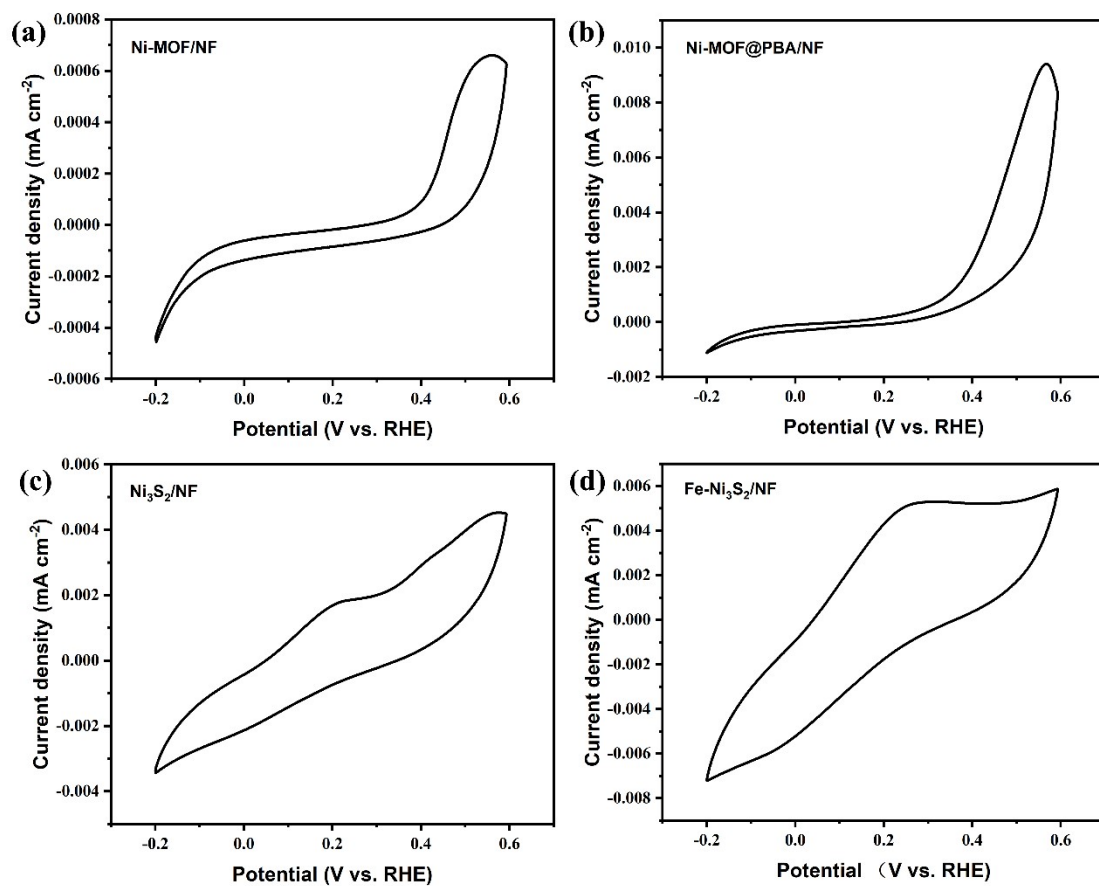

**Fig. S12.** CV curves of (a) Ni-MOF/NF, (b) Ni-MOF@PBA/NF, (c) Ni<sub>3</sub>S<sub>2</sub>/NF and (d) Fe-Ni<sub>3</sub>S<sub>2</sub>/NF in PB (pH = 7.0) at a scan rate of 50 mV s<sup>-1</sup>.

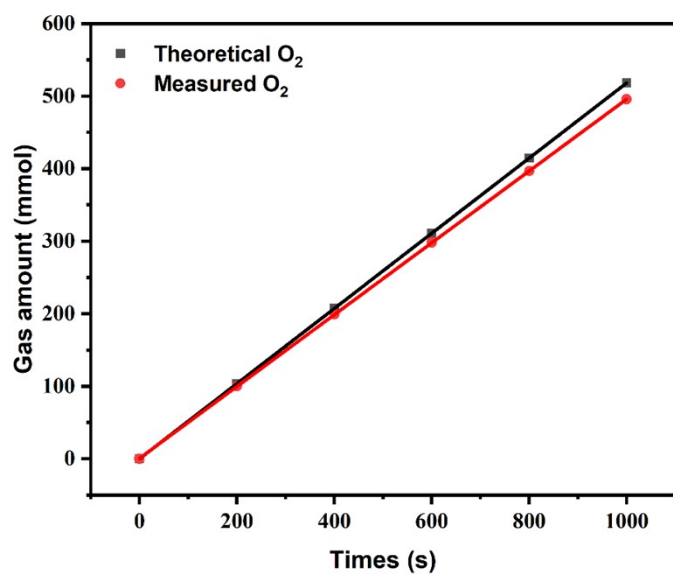

Fig. S13. The Faradaic efficiency of OER.

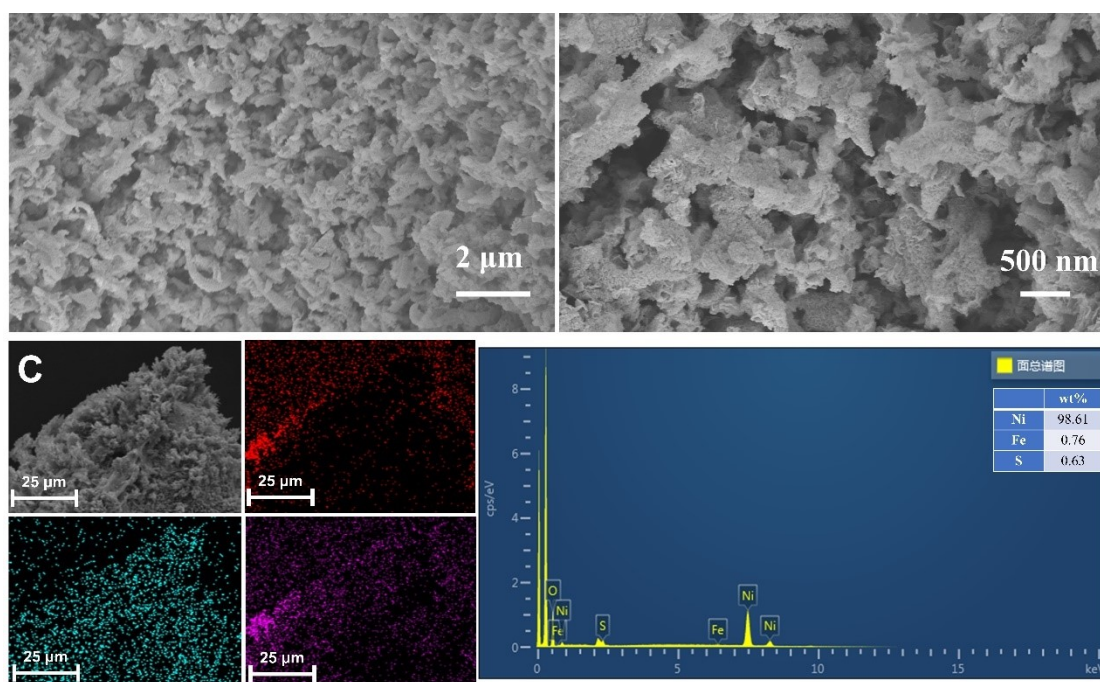

Fig. S14. (a, b) SEM images of Fe-Ni<sub>3</sub>S<sub>2</sub>/NF after OER. (c) The EDS elemental analysis of Fe-Ni<sub>3</sub>S<sub>2</sub>/NF after OER.

**Table S1.** Comparison of OER activity of Fe-Ni<sub>3</sub>S<sub>2</sub>/NF (red words) and recently reported Ni<sub>3</sub>S<sub>2</sub> based electrocatalysts.

| Catalysts                                                      | Support | Electrolyte | J/mA<br>cm <sup>-2</sup> | Overpotential/<br>mV | Tafel/ mV<br>dec <sup>-1</sup> | Ref.      |
|----------------------------------------------------------------|---------|-------------|--------------------------|----------------------|--------------------------------|-----------|
| Fe-Ni <sub>3</sub> S <sub>2</sub>                              | NF      | 1.0 M KOH   | 10                       | 232                  | 83.69                          | This work |
| G@Ni <sub>3</sub> S <sub>2</sub>                               | NF      | 1.0 M KOH   | 10                       | 249                  | 98.2                           | [S1]      |
| Ni <sub>3</sub> S <sub>2</sub> @Ni                             | CC      | 1.0 M KOH   | 10                       | 290.9                | 101.26                         | [S2]      |
| F-Ni <sub>3</sub> S <sub>2</sub>                               | NF      | 1.0 M KOH   | 10                       | 239                  | 36                             | [S3]      |
| Cu-Ni <sub>3</sub> S <sub>2</sub>                              | NF      | 1.0 M KOH   | 10                       | 259                  | 54.9                           | [S4]      |
| Ni <sub>3</sub> S <sub>2</sub> -CeO <sub>2</sub>               | NF      | 1.0 M KOH   | 20                       | 264                  | 146                            | [S5]      |
| NiFeCuP@Ni <sub>3</sub> S <sub>2</sub>                         | NF      | 1.0 M KOH   | 10                       | 230                  | 42                             | [S6]      |
| Ni <sub>3</sub> S <sub>2</sub> @Ni <sub>5</sub> P <sub>4</sub> | NF      | 1.0 M KOH   | 50                       | 399                  | 75                             | [S7]      |
| Ni <sub>3</sub> S <sub>2</sub> -Co <sub>9</sub> S <sub>8</sub> | NF      | 1.0 M KOH   | 20                       | 294                  | 80                             | [S8]      |
| Bi <sub>2</sub> S <sub>3</sub> /Ni <sub>3</sub> S <sub>2</sub> | NF      | 1.0 M KOH   | 10                       | 268                  | 82                             | [S9]      |
| Ni-Fe-OH/Ni <sub>3</sub> S <sub>2</sub>                        | NF      | 1.0 M KOH   | 10                       | 268                  | 54                             | [S10]     |
| Cu <sub>2</sub> S-Ni <sub>3</sub> S <sub>2</sub>               | NF      | 1.0 M KOH   | 10                       | 329                  | 44.11                          | [S11]     |
| Co-Ni <sub>3</sub> S <sub>2</sub>                              | NF      | 1.0 M KOH   | 20                       | 297                  | 50.3                           | [S12]     |
| Fe-Ni <sub>3</sub> S <sub>2</sub> /rGO                         | NF      | 1.0 M KOH   | 20                       | 247                  | 63                             | [S13]     |
| Ni <sub>3</sub> S <sub>2</sub> @Co(OH) <sub>2</sub>            | NF      | 1.0 M KOH   | 10                       | 257                  | 63.1                           | [S14]     |
| NiFe LDH@Ni <sub>3</sub> S <sub>2</sub>                        | NF      | 1.0 M KOH   | 20                       | 271                  | 77                             | [S15]     |
| NiO-Ni <sub>3</sub> S <sub>2</sub>                             | NF      | 1.0 M KOH   | 20                       | 290                  | 75                             | [S16]     |
| Co <sub>3</sub> O <sub>4</sub> @Ni <sub>3</sub> S <sub>2</sub> | NF      | 1.0 M KOH   | 20                       | 260                  | 121.7                          | [S17]     |
| Ni <sub>3</sub> S <sub>2</sub> /MnO <sub>2</sub>               | NF      | 1.0 M KOH   | 10                       | 260                  | 61                             | [S18]     |

NF: Nickel foam; CC: Carbon Cloth.

**Table S2.** Resistance values of various samples at 1.524 V vs. RHE.

| Catalysis                             | $R_s/\Omega$  | $R_{ct}/\Omega$ |
|---------------------------------------|---------------|-----------------|
| Ni-MOF /NF                            | 1.32 $\Omega$ | 3.46 $\Omega$   |
| Ni-MOF@PBA/NF                         | 1.36 $\Omega$ | 2.94 $\Omega$   |
| Ni <sub>3</sub> S <sub>2</sub> /NF    | 1.34 $\Omega$ | 2.40 $\Omega$   |
| Fe-Ni <sub>3</sub> S <sub>2</sub> /NF | 1.34 $\Omega$ | 1.27 $\Omega$   |
| NF                                    | 1.36 $\Omega$ | 101.00 $\Omega$ |

## References

- S1. C. L. Jin, N. Zhou, Y. L. Wang, X. Li, M. Chen, Y. Z. Dong, Z. S. Yu, Y. N. Liang, D. Y. Qu, Y. L. Dong, Z. Z. Xie and C. C. Zhang, *J. Electroanal. Chem.*, 2020, **858**, 113795.
- S2. H. Qian, B. X. Wu, Z. W. Nie, T. T. Liu, P. Liu, H. He, J. H. Wu, Z. Y. Chen and S. G. Chen, *Chem. Eng. J.*, 2021, **420**, 127646.
- S3. Q. C. Xu, M. S. Chu, M. M. Liu, J. H. Zhang, H. Jiang and C. Z. Li, *Chem. Eng. J.*, 2021, **411**, 128488.
- S4. H. Y. Liu, Z. X. Guo and J. S. Lian, *J. Solid State Chem.*, 2021, **293**, 121776.
- S5. Q. Wu, Q. P. Gao, L. M. Sun, H. M. Guo, X. S. Tai, D. Li, L. Liu, C. Y. Ling and X. P. Sun, *Chin. J. Catal.*, 2021, **42**, 482-489.
- S6. M. Khodabakhshi, S. M. Chen, T. Ye, H. Wu, L. Yang, W. F. Zhang and H. X. Chang, *ACS Appl. Mater. Interfaces*, 2020, **12**, 36268-36276.
- S7. S. Khan, T. Ali, X. F. Wang, W. Iqbal, T. Bashir, W. Chao, H. Sun, H. L. Lu, C. L. Yan and R. M. Irfan, *Chem. Eng. Sci.*, 2022, **247**, 117020.
- S8. R. Zhang, L. Z. Cheng, Z. Wang, F. Y. Kong, Y. Tsegazab, W. X. Lv and W. Wang, *Appl. Surf. Sci.*, 2020, **526**, 146753.
- S9. S. Wang, W. D. Xue, Y. Fang, Y. Q. Li, L. L. Yan, W. J. Wang and R. Zhao, *J. Colloid Interface Sci.*, 2020, **573**, 150-157.
- S10. W. J. He, G. Ren, Y. Li, D. B. Jia, S. Y. Li, J. N. Cheng, C. C. Liu, Q. Y. Hao, J. Zhang and H. Liu, *Catal. Sci. Technol.*, 2020, **10**, 1708-1713.
- S11. K. S. Bhat and H. S. Nagaraja, *ChemistrySelect*, 2020, **5**, 2455-2464.
- S12. X. Tong, Y. Li, N. Pang, Y. H. Qu, C. H. Yan, D. Y. Xiong, S. H. Xu, L. W. Wang and P. K. Chu, *Chem. Eng. J.*, 2021, **425**, 12.
- S13. D. M. Shao, P. W. Li, R. Z. Zhang, C. H. Zhao, D. Q. Wang and C. J. Zhao, *Int. J. Hydrog. Energy*, 2019, **44**, 2664-2674.
- S14. S. P. Wang, L. Xu and W. X. Lu, *Appl. Surf. Sci.*, 2018, **457**, 156-163.
- S15. X. Q. Liang, Y. H. Li, H. Fan, S. J. Deng, X. Y. Zhao, M. H. Chen, G. X. Pan, Q. Q. Xiong and X. H. Xia, *Nanotechnology*, 2019, **30**, 9.
- S16. L. S. Peng, J. J. Shen, X. Q. Zheng, R. Xiang, M. M. Deng, Z. X. Mao, Z. P. Feng, L. Zhang,

- L. Li and Z. D. Wei, *J. Catal.*, 2019, **369**, 345-351.
- S17. Y. Q. Gong, Z. F. Xu, H. L. Pan, Y. Lin, Z. Yang and X. Q. Du, *J. Mater. Chem. A*, 2018, **6**, 5098-5106.
- S18. Y. Xiong, L. L. Xu, C. D. Jin and Q. F. Sun, *Appl. Catal. B-Environ.*, 2019, **254**, 329-338.
